# Supplementary material
Source: PubMed Central journal article supplement (PMC2597632)
Supplement: NIHMS59411-supplement-Supp_Fig_1.pdf [file NIHMS59411-supplement-Supp_Fig_1.pdf]

Jeewon Kim, Supplemental Figure 1

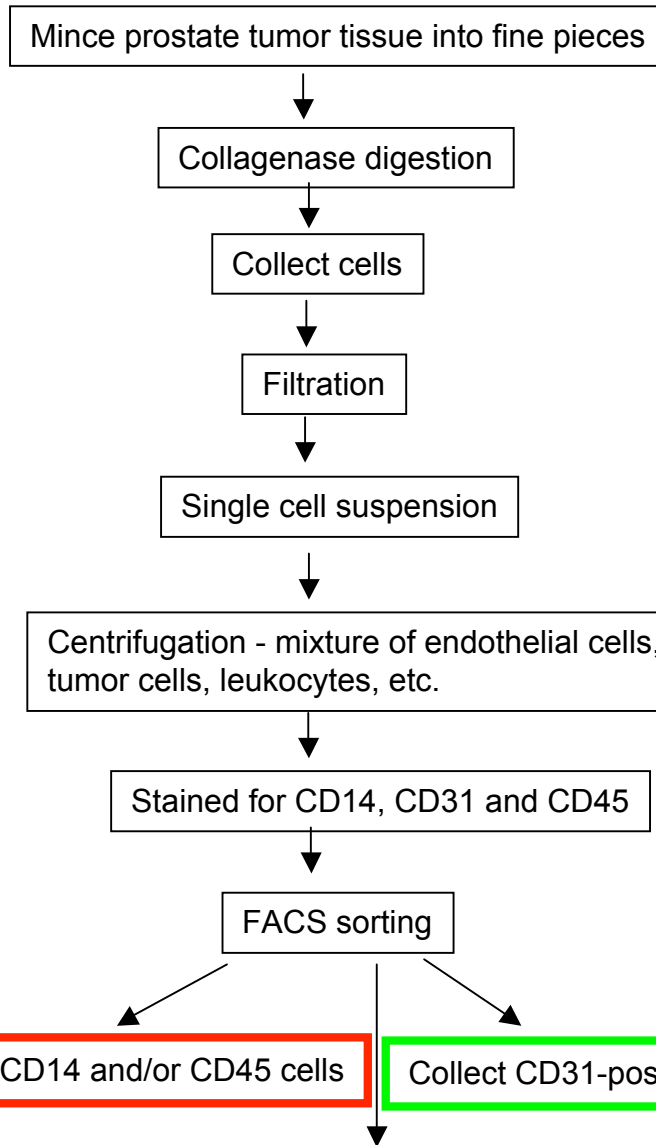

Cells stained with control antibodies

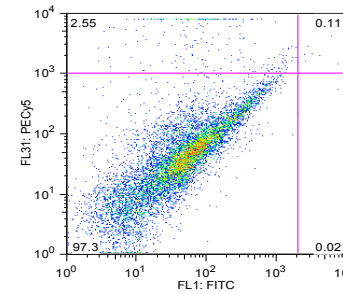

Cells stained with anti-cd45 Cy5PE and anti-CD31-FITC

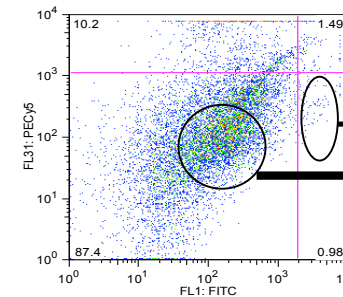

Tumor endothelial cells  
Tumor cells

Discard cells positive for CD14 and/or CD45 cells

Collect CD31-positive cells : "tumor endothelial cells"

Collect cells triple negative for CD14, CD31 and CD45 : "tumor epithelial cells"
