# Supplementary material
Source: PubMed Central journal article supplement (PMC2597632)

Jeewon Kim, Supplemental Figure 2

A

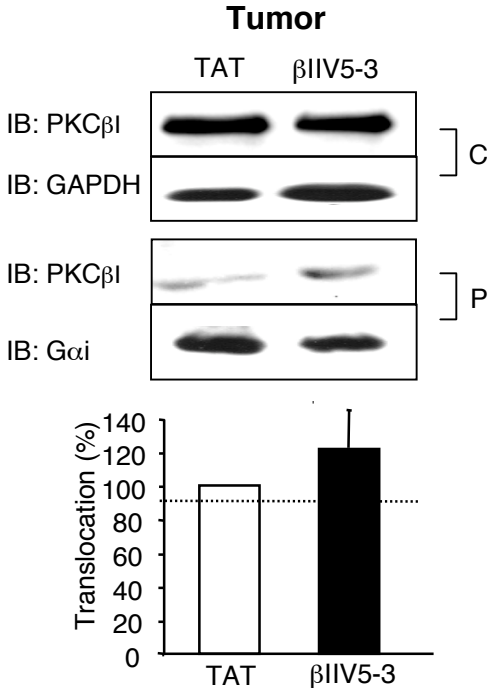

B

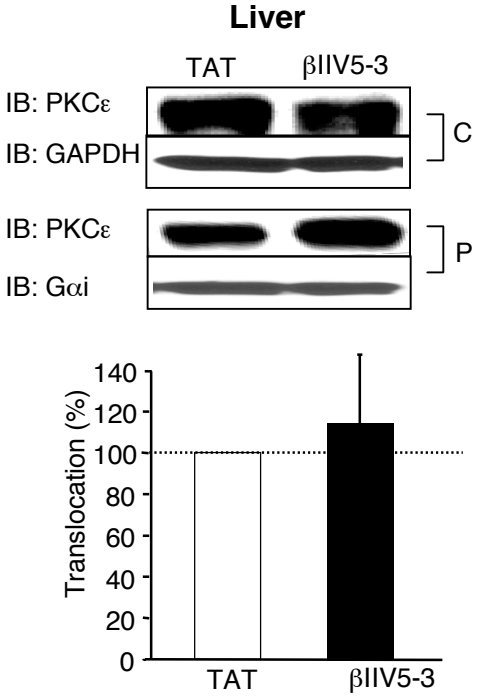

Supplement: NIHMS59411-supplement-Supp_Fig_2.pdf [file NIHMS59411-supplement-Supp_Fig_2.pdf]

Jeewon Kim, Supplemental Figure 3

Nuclei

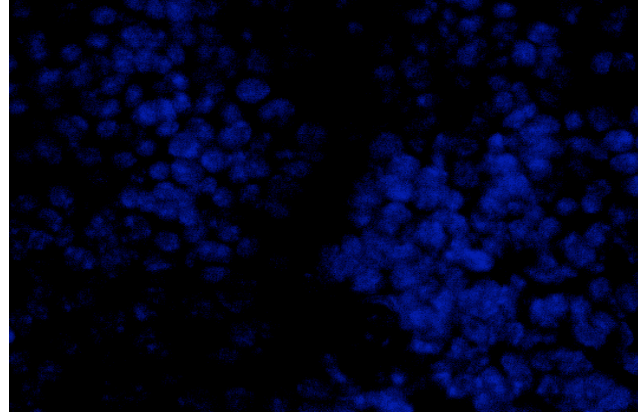

Pericentrin

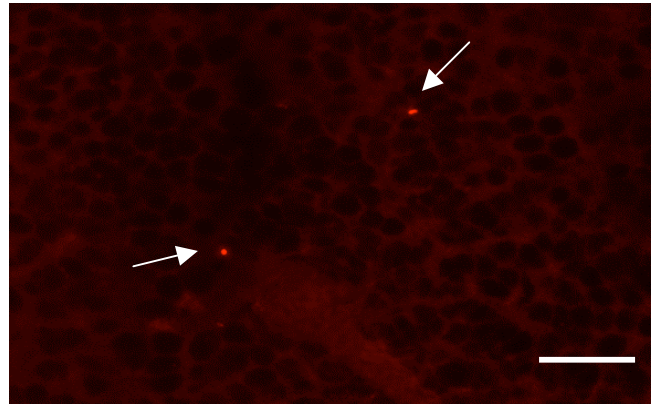

Supplement: NIHMS59411-supplement-Supp_Fig_3.pdf [file NIHMS59411-supplement-Supp_Fig_3.pdf]

Jeewon Kim, Supplemental Figure 4

A

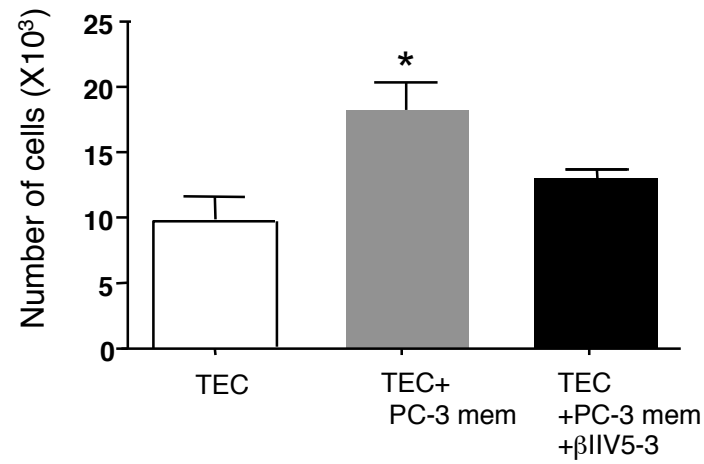

B

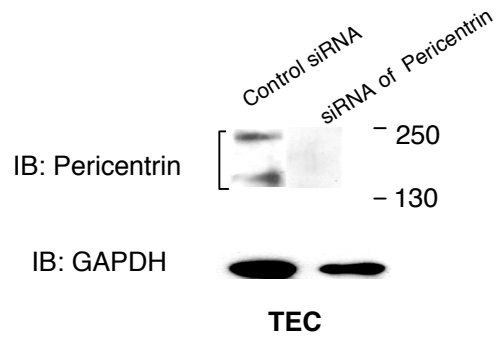

C

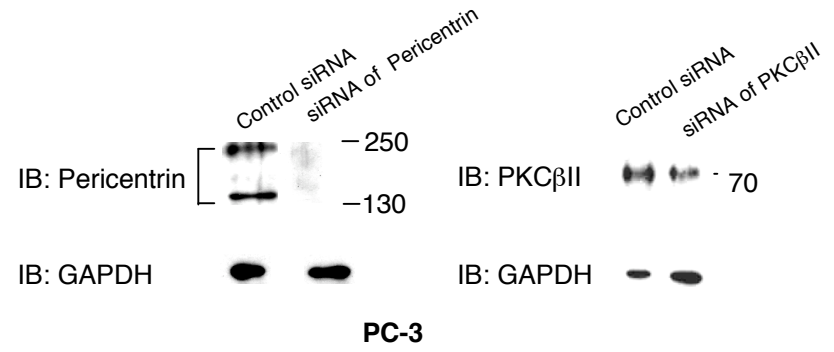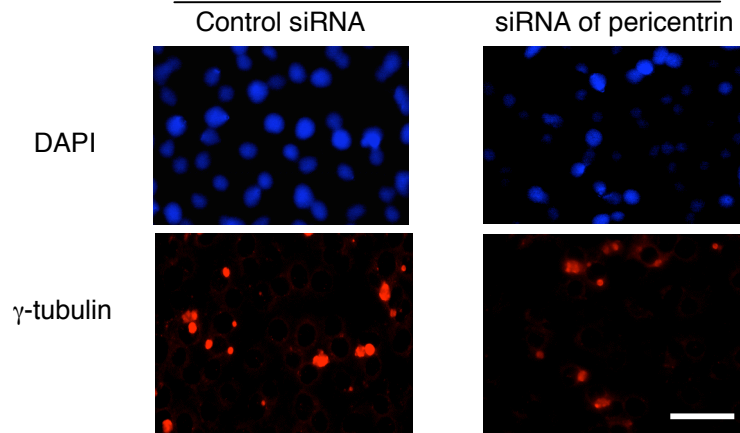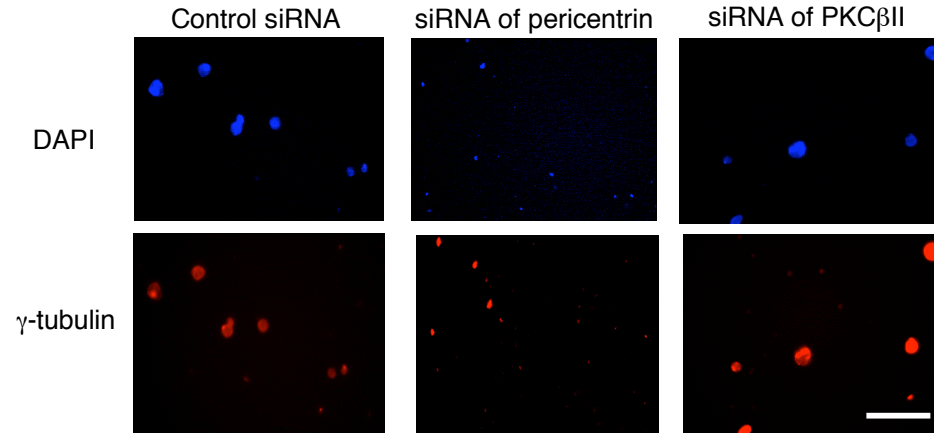

Supplement: NIHMS59411-supplement-Supp_Fig_4.pdf [file NIHMS59411-supplement-Supp_Fig_4.pdf]

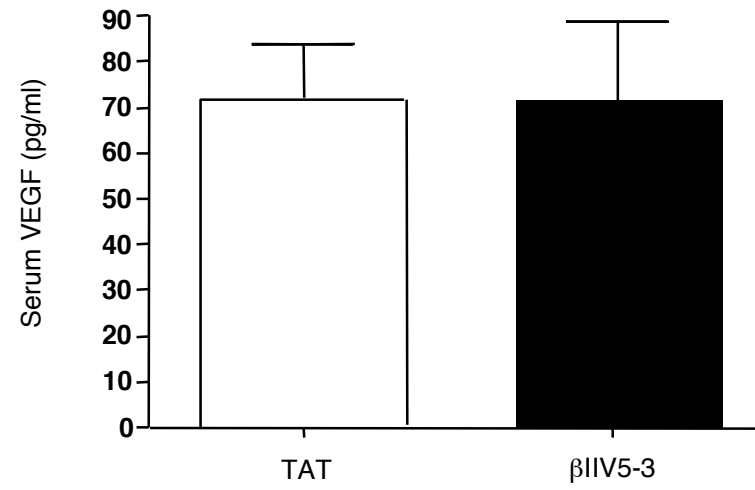

Supplement: NIHMS59411-supplement-Supp_Fig_5.pdf [file NIHMS59411-supplement-Supp_Fig_5.pdf]

Jeewon Kim, Supplemental Figure 6

IB: PKC $\beta$ II

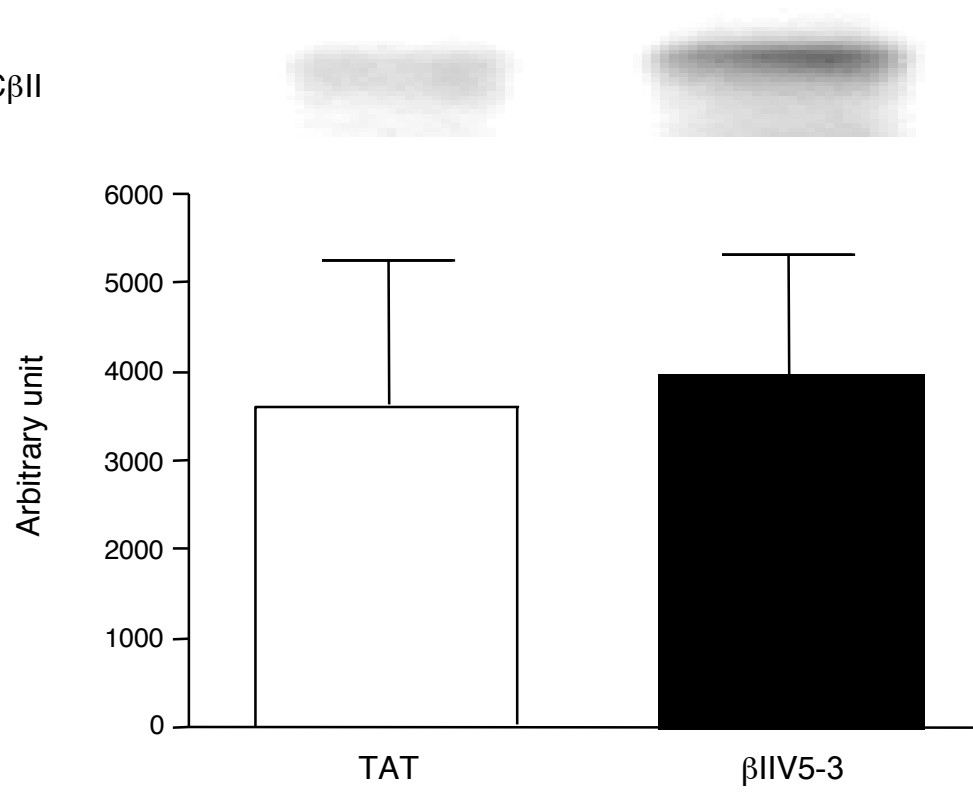

Supplement: NIHMS59411-supplement-Supp_Fig_6.pdf [file NIHMS59411-supplement-Supp_Fig_6.pdf]
